# Supplementary material
Source: PubMed Central journal article supplement (PMC7964471)
Supplement: 3281_table.pdf [file 3281_table.pdf]

**On-line Table: Comparison of ADC values acquired from several references studying head and neck lesions**

| Authors                        | Scanners               | Diseases                                                  | No.            | ADC Value ( $\times 10^{-3}$ mm <sup>2</sup> /s) |                     |                        | Sensitivity (%) | Specificity (%) | Accuracy (%) | b-Value |
|--------------------------------|------------------------|-----------------------------------------------------------|----------------|--------------------------------------------------|---------------------|------------------------|-----------------|-----------------|--------------|---------|
|                                |                        |                                                           |                | Cutoff                                           | Benign <sup>a</sup> | Malignant <sup>a</sup> |                 |                 |              |         |
| This study                     | 3T Verio, Siemens      | B/M LNs                                                   | 146/23         | 0.851                                            | 1.08                | 0.7                    | 91.3            | 91.1            | 91.0         | 0/800   |
| Srinivasan et al <sup>9</sup>  | 3T Achieva, Philips    | B/M head and neck tumor                                   | 17/16          | 1.3                                              | 1.505               | 1.071                  | —               | —               | —            | 0/1000  |
| Vandecaveye et al <sup>5</sup> | 1.5T Sonata, Siemens   | B/M LNs                                                   | 227/74         | 0.94                                             | 1.19                | 0.85                   | 94.6            | 95.9            | 95.5         | 0/1000  |
| Abdel Razek et al <sup>6</sup> | 1.5T Symphony, Siemens | B/M LNs<br>Lymphoma                                       | 15/51<br>21    | 1.38                                             | 1.64                | 1.09                   | 98.0            | 88.0            | 96.0         | 0/1000  |
| Perrone et al <sup>7</sup>     | 1.5T Avanto, Siemens   | B/M LNs                                                   | 14/17          | 1.03                                             | 1.448               | 0.85                   | 100             | 92.9            | —            | 0/1000  |
| Sumi et al <sup>4</sup>        | 1.5T Signa, GE         | B/M LNs/nodal lymphoma                                    | 25/25/5        | 0.4                                              | 0.302               | 0.401                  | 52.0            | 96.7            | —            | 0/1000  |
| Herneth et al <sup>8</sup>     | —                      | B/M LNs                                                   | 5/12           | —                                                | 1.21                | 0.59                   | —               | —               | —            | 0/800   |
| Wang et al <sup>13</sup>       | 1.5T Symphony, Siemens | LN benign solid tumor/lymphoma<br>Cystic lesion/carcinoma | 22/13<br>10/36 | 1.22                                             | 1.56                | 0.66                   | 84.0            | 91.0            | 86.0         | 0/1000  |
| Maeda et al <sup>17</sup>      | 1.5T Signa, GE         | Squamous cell carcinoma lymphoma                          | 39<br>13       | 0.76                                             | —                   | 1.13                   | —               | —               | —            | 0/1000  |

**Note:**—B/M indicates benign/malignant; LN, lymph node.

<sup>a</sup> Data are the mean values.
